# Supplementary material for: Glycocalyx heparan sulfate cleavage promotes endothelial cell angiopoietin-2 expression by impairing shear stress–related AMPK/FoxO1 signaling
Source: JCI journal article supplement (doi:10.1172/jci.insight.155010), 2022-06-28
Supplement: sd1 [file 1]

**Glycocalyx heparan sulfate cleavage promotes endothelial cell angiopoietin-2 expression  
by impairing shear stress-related AMPK/FoxO1 signaling**

Robert P. Richter, Amit R. Ashtekar, Lei Zheng, Danielle Pretorius, Kaushlendra Tripathi, Ralph  
D. Sanderson, Amit Gaggar, Jillian R. Richter

**SUPPLEMENTAL MATERIAL**

**FIGURES**

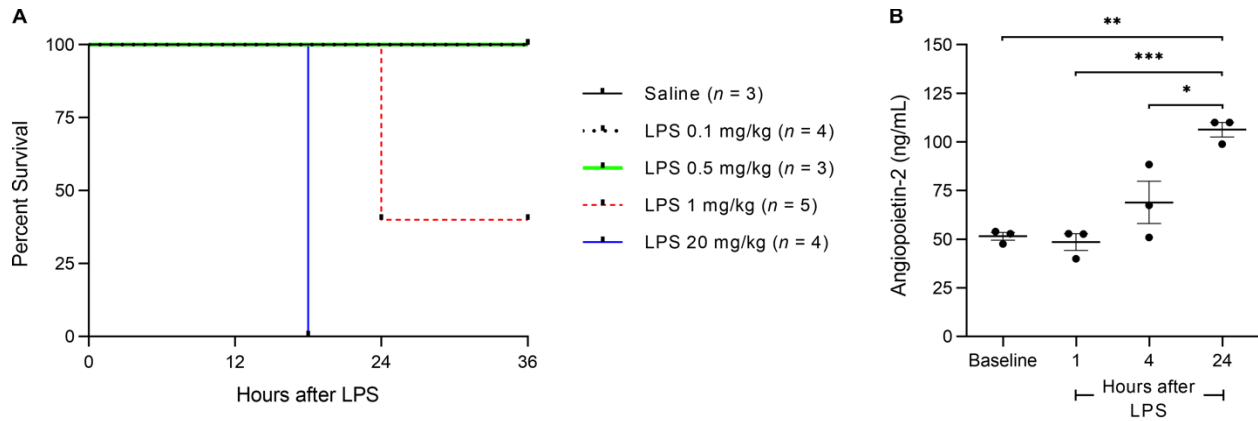

**Supplemental Figure S1. Survival curve of increasing doses of lipopolysaccharide (LPS) administration and the time-dependent response of plasma angiopoietin-2 levels following LPS injection.** (A) Kaplan-Meier survival curves of groups of C57BL/6J WT 12-14 week-old male mice who received retro-orbital injections with LPS 0.1, 0.5, 1, 20 mg/kg or vehicle (n = 3-5). We observed that LPS doses less than or equal to 0.5 mg/kg were sublethal, informing the LPS 0.1 mg/kg dose used to measure plasma levels of IL-6 and heparan sulfate depicted in Figure 2B and 2C. (B) Plasma angiopoietin-2 (Ang-2) levels in the three surviving mice following LPS 1 mg/kg injection shown in panel A. \* $P < 0.05$ , \*\* $P < 0.01$ , and \*\*\* $P < 0.001$  versus baseline after ordinary 1-way ANOVA corrected by Tukey's multiple comparisons test. Data are presented as mean  $\pm$  SEM.

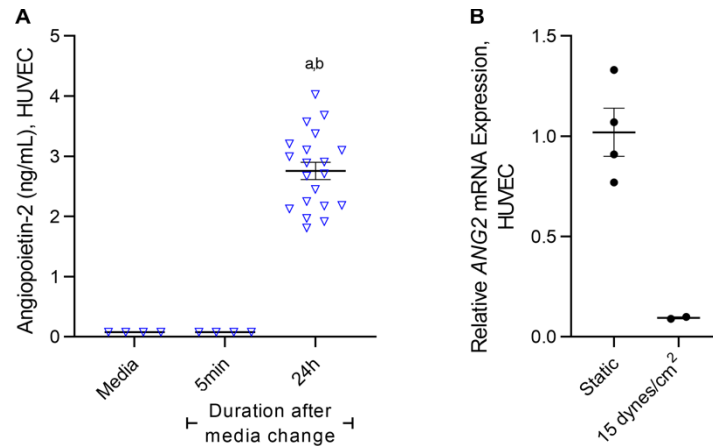

**Supplemental Figure S2. Constitutive *ANG2* gene expression in human umbilical vein endothelial cells (HUVEC) is suppressed by shear stress application. (A)** Ang-2 levels (ELISA) in HUVEC media (n = 4), HUVEC supernatant within 5min of media change (n = 4), and HUVEC supernatant after 24h of static culture (n = 20). <sup>a</sup>*P* < 0.001 versus media, <sup>b</sup>*P* < 0.001 versus 5min after ordinary 1-way ANOVA corrected by Tukey's multiple comparisons test. **(B)** Relative HUVEC *ANG2* gene expression after 24h of static culture (n = 4) or 48h of 15 dyn/cm<sup>2</sup> (n = 2). All data are presented as mean ± SEM.

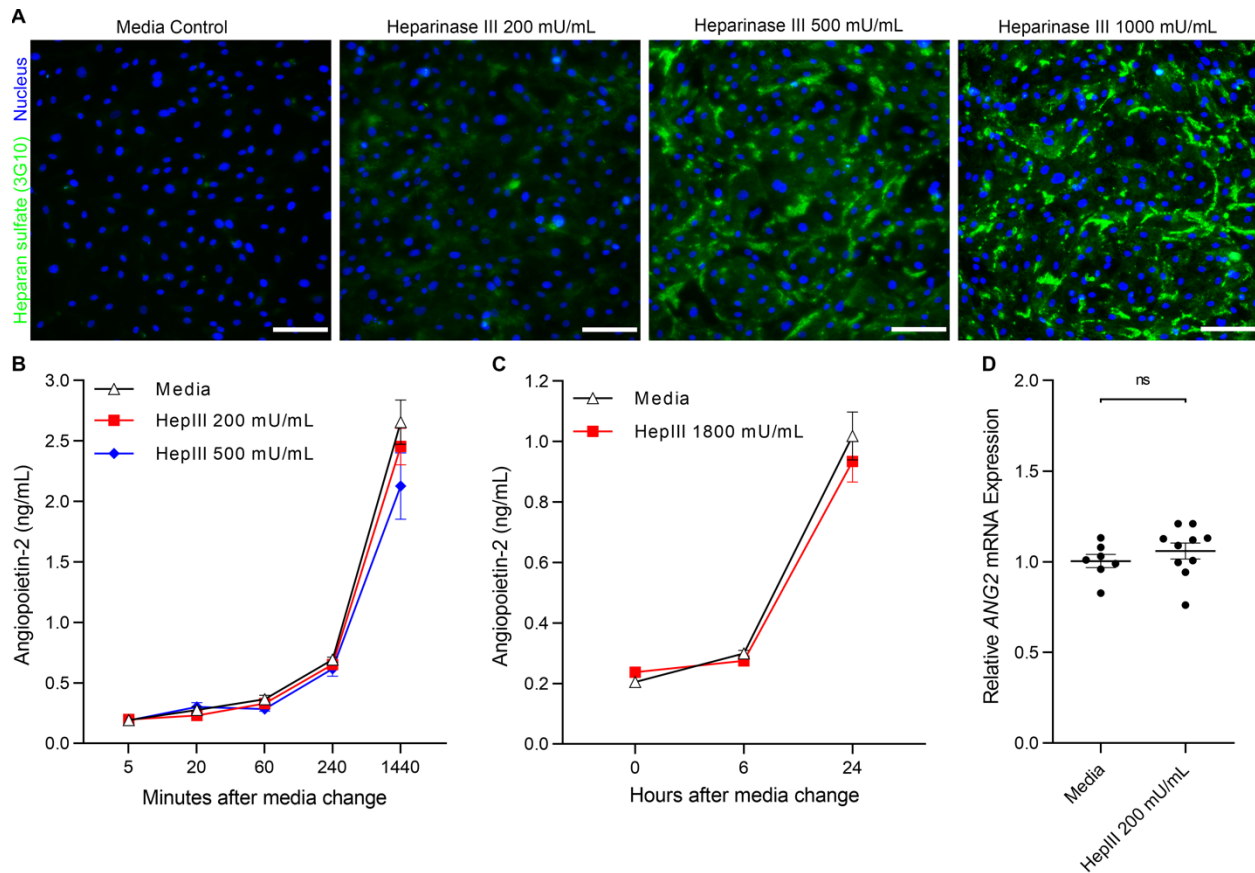

**Supplemental Figure S3. Heparinase III (HepIII) treatment of statically cultured human lung microvascular endothelial cells (HLMVEC) results in a dose-dependent erosion of surface heparan sulfate but does not alter Ang-2 protein or *ANG2* gene expression.** (A) Representative 20x epifluorescence images demonstrating staining for cleaved heparan sulfate (exposed 3G10 epitope) on HLMVECs treated with increasing doses of HepIII (2h treatment) (with DAPI overlay). Scale bar = 100  $\mu$ m. Note the increased staining intensity for heparan sulfate 3G10 with increasing HepIII concentrations, becoming visually apparent by 200 mU/mL. (B) Supernatant Ang-2 levels (ELISA) from HLMVECs over the course of 24h after treatment with vehicle (media), HepIII 200 mU/mL, or HepIII 500 mU/mL ( $n = 4$  per group per time point). There were no significant changes in Ang-2 secretion associated with HepIII dose after 2-way ANOVA corrected by Šídák's multiple comparisons test. (C) Supernatant Ang-2 levels (ELISA) from HLMVECs over the course of 24h after treatment with HepIII 1800 mU/mL or vehicle (media) ( $n = 4$  per group per time point). There were no significant changes in Ang-2 levels associated with high-dose HepIII treatment after 2-way ANOVA corrected by Šídák's multiple comparisons test. (D) Relative *ANG2* gene expression from statically cultured HLMVECs in the presence ( $n = 10$ ) or absence ( $n = 7$ ) of HepIII 200 mU/mL (24h treatment). *ns* represents non-significance after Student's *t*-test. All data are presented as mean  $\pm$  SEM.

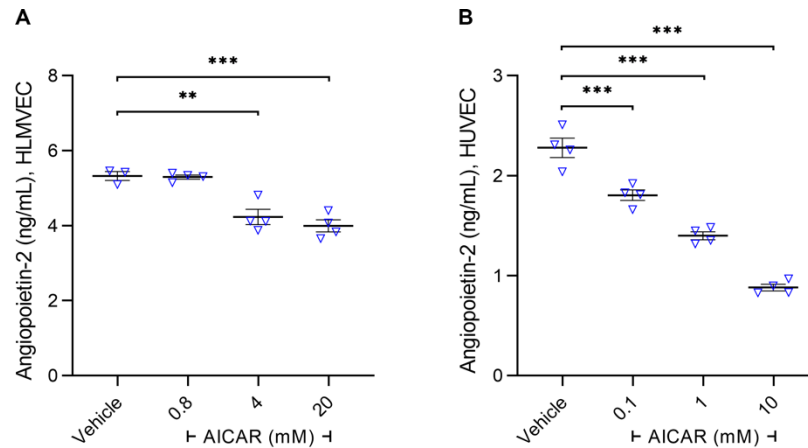

**Supplemental Figure S4. Effect of AMPK activation on Ang-2 secretion from HLMVECs and HUVECs.** (A) Supernatant Ang-2 levels (ELISA) from statically cultured HLMVECs 24h following treatment with increasing doses of AICAR or vehicle (n = 4 per group). \*\* $P < 0.01$ , \*\*\* $P < 0.001$  after 1-way ANOVA corrected by Tukey's multiple comparisons test. (B) Supernatant Ang-2 levels (ELISA) from HUVECs 24h after treatment with increasing doses of AICAR or vehicle (n = 4 per group). \*\*\* $P < 0.001$  after ordinary 1-way ANOVA corrected by Tukey's multiple comparisons test. All data are presented as mean  $\pm$  SEM.

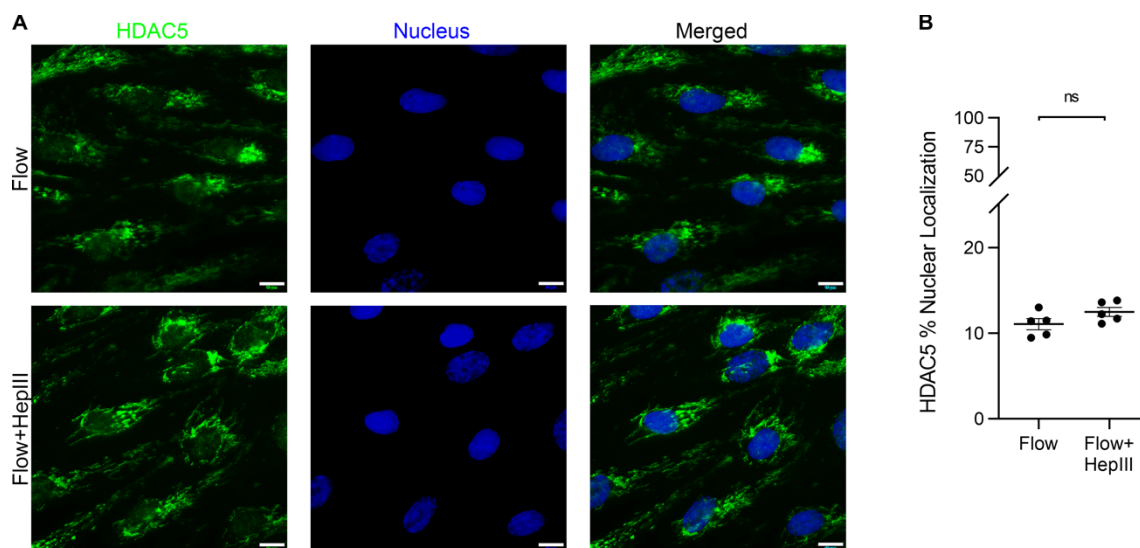

**Supplemental Figure S5. Heparan sulfate cleavage from flow conditioned HLMVECs does not affect cellular localization of histone deacetylase 5 (HDAC5).** (A) Representative 100x epifluorescence images demonstrating staining for HDAC5 in flow conditioned HLMVECs (15 dyn/cm<sup>2</sup>, 48h) exposed to an additional 24h of 15 dyn/cm<sup>2</sup> in the absence (top row) or presence (bottom row) of HepIII 200 mU/mL (with DAPI overlay). Scale bar: 10  $\mu$ m. (B) Relative staining intensity for HDAC5 within the nuclear fraction of flow conditioned HLMVECs (15 dyn/cm<sup>2</sup>, 48h) exposed to an additional 24h of 15 dyn/cm<sup>2</sup> in the absence or presence of HepIII 200 mU/mL (from 5 representative 20x images, normalized to number of nuclei within field of view). Ns represents non-significance after Student's *t*-test. Data presented as mean  $\pm$  SEM.

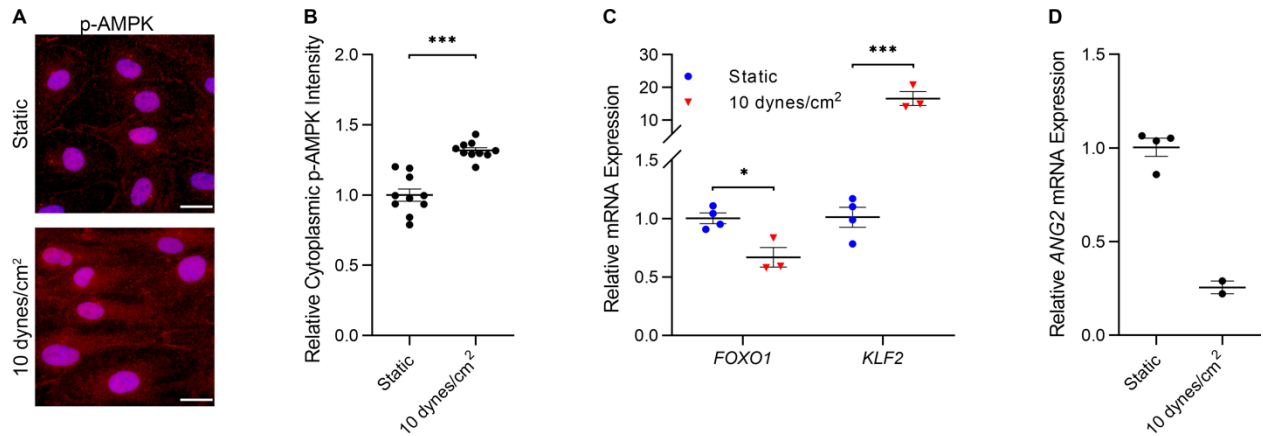

**Supplemental Figure S6. Effect of lower shear stress on 5'-adenosine monophosphate-activated protein kinase (AMPK) phosphorylation and Forkhead Box O1 (FOXO1), Krüppel-like factor 2 (KLF2), and ANG2 gene expression within HLMVECs.** (A) Representative 100x epifluorescence images of HLMVECs stained for phosphorylated-AMPK (p-AMPK) following 48h of static culture (top) or 10 dyn/cm<sup>2</sup> (bottom) (with DAPI overlay). Scale bar = 20  $\mu$ m. (B) Relative staining intensity for p-AMPK in the cytoplasm of HLMVECs following 48h of static culture or 10 dyn/cm<sup>2</sup> (from 10 representative 40x images, normalized to number of nuclei within field of view). \*\*\* $P < 0.001$  after Student's  $t$ -test. (C) Relative FOXO1 and KLF2 mRNA expression in HLMVECs following 48h of static culture ( $n = 4$ ) or 10 dyn/cm<sup>2</sup> ( $n = 3$ ). \* $P < 0.05$ , \*\*\* $P < 0.001$  after Student's  $t$ -test. (D) Relative ANG2 mRNA expression in HLMVECs following 48h of static culture ( $n = 4$ ) or 10 dyn/cm<sup>2</sup> ( $n = 2$ ). All data are presented as mean  $\pm$  SEM.
